# Supplementary material for: Predictive skill for atmospheric rivers in the western Iberian Peninsula
Source: Copernicus journal article supplement (doi:10.5194/nhess-20-877-2020), 2020-03-30
Supplement: Supplementary file 1 [file nhess-20-877-2020-supplement.pdf]

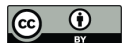

*Supplement of*

## **Predictive skill for atmospheric rivers in the western Iberian Peninsula**

**Alexandre M. Ramos et al.**

*Correspondence to:* Alexandre M. Ramos (amramos@fc.ul.pt)

The copyright of individual parts of the supplement might differ from the CC BY 4.0 License.

### Supplementary Material

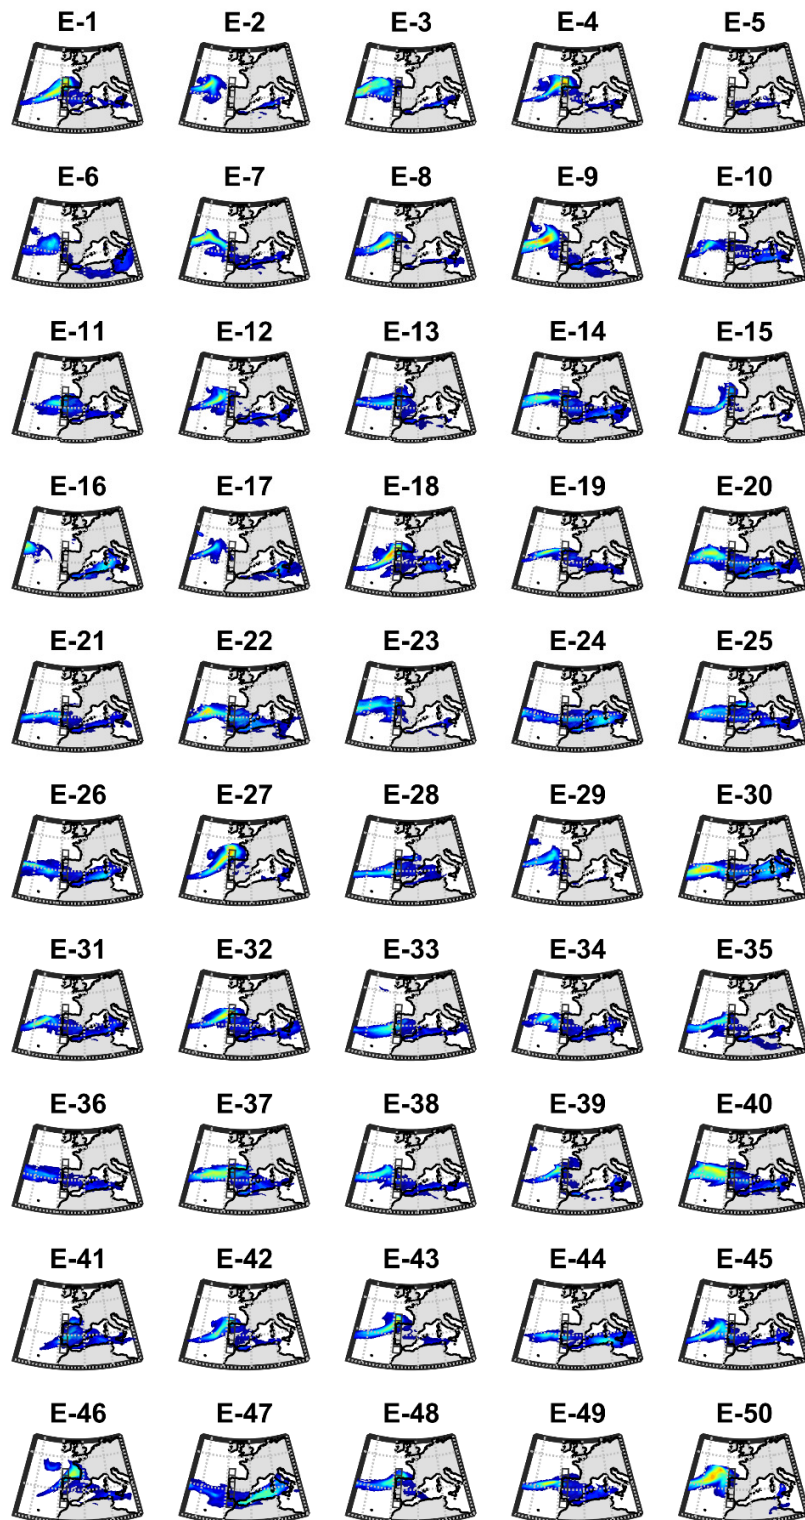

**Figure S1.** Ensemble forecast of the IVT in an event affecting Western Iberia on January 4 2016 for lead time -5 days.

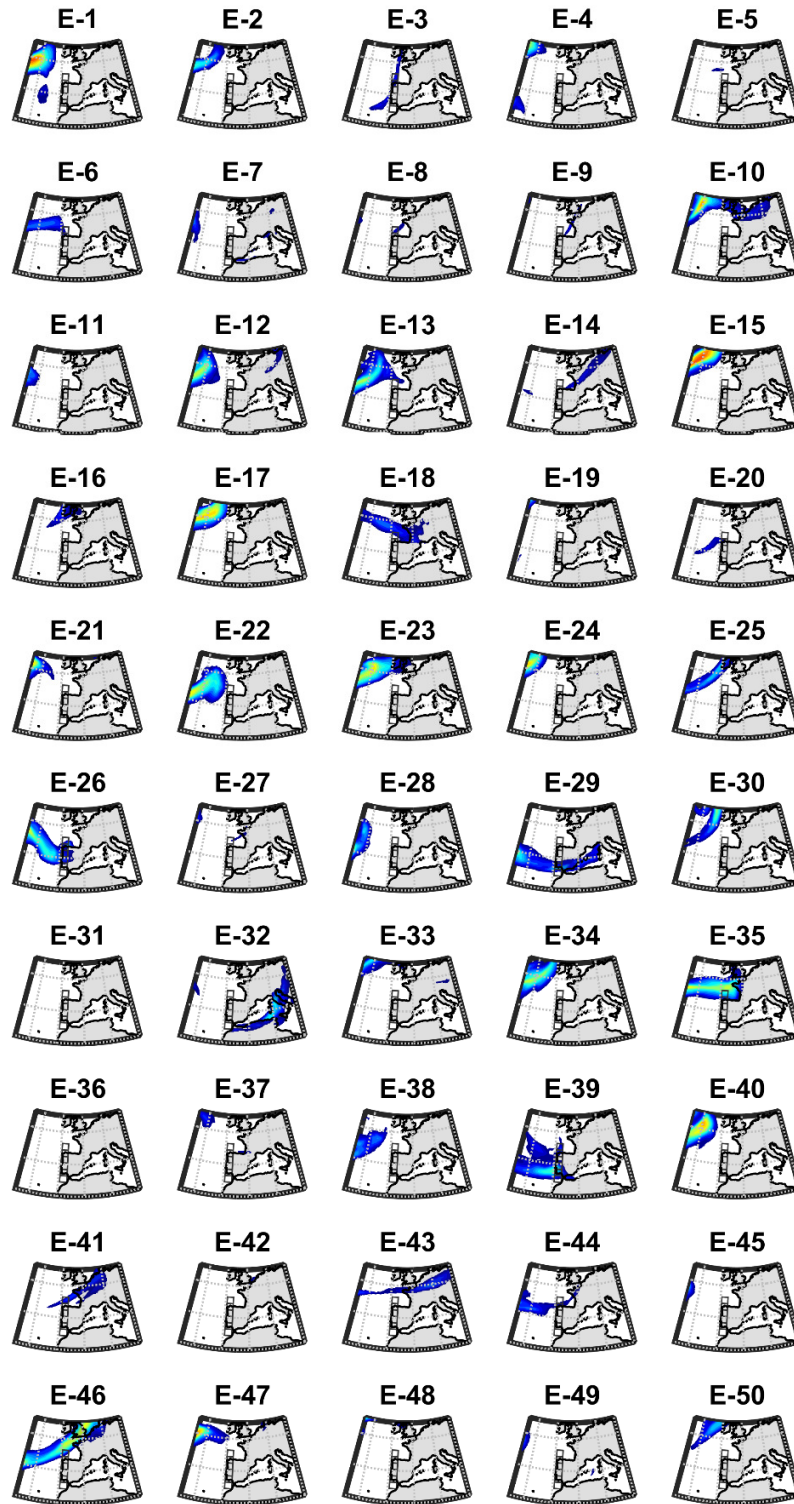

**Figure S2.** Ensemble forecast of the IVT in an event affecting Western Iberia on January 4 2016 for lead time -12 days.

$$\mathbf{POD = HITS / (HITS+MISSES)}$$

$$\mathbf{FAR = FALSE / (HITS+FALSE)}$$

$$\mathbf{SR = HITS / (HITS+FALSE)}$$

$$\mathbf{BIAS = (HITS+FALSE) / (HITS+MISSES)}$$

Figure S3. Metrics used in Figure 9: probability of detection (POD), Success Rate (RS), False Alarm Rate (FAR) and the BIAS.
